# Supplementary material for: Non-Random Enrichment of Single-Nucleotide Polymorphisms Associated with Clopidogrel Resistance within Risk Loci Linked to the Severity of Underlying Cardiovascular Diseases: The Role of Admixture
Source: Genes (Basel). 2023 Sep 17;14(9):1813. doi: 10.3390/genes14091813 (PMC10531115; doi:10.3390/genes14091813)
Supplement: Supplementary file 1 [file genes-14-01813-s001.zip › genes-2611583-supplementary tables.xlsx]

## Sheet: Table S1
Table S.1. eQTL’s from SNPs on chromosome 1 associated to cardiovascular conditions.
eQTL gene	Encoding protein	Function	Trait	rs17114046	rs7528419	rs12740374	rs602633	rs6025	rs201052613	rs35158675	rs17465982
PLPP3	phospholipid phosphatase 3	Converts phosphatidic acid to diacylglycerol. Involved in lipid synthesis and receptor signaling.	Regulation & signaling	x
CELSR2	cadherin EGF LAG seven-pass G-type receptor 2	Cell adhesion molecules involved in contact-mediated communication.	Regulation & signaling		x	x
SORT1	sortilin 1	Receptor involved in transporting proteins to organelles and cell surface.	Transportation, regulation, & signaling		x	x	x
PSRC1	proline and serine rich coiled-coil 1	Mediates microtubules destabilization in mitotic process and is a target for p53 protein.	Structure		x	x	x
ATXN7L2	ataxin 7 like 2	Nuclear protein.	Regulation & signaling		x
SYPL2	synaptophysin like 2	Mediates communication between T-tubular and junctional sarcoplasmic reticulum (SR) membranes.	Regulation & signaling		x
GSTM4	glutathione S-transferase mu 4	Conjugates glutathion to xenobiotic and electrophilic compounds.	Regulation & signaling		x
SARS	seryl-tRNA synthetase	Involved in catalazing the incorporation of serine during translation.	Regulation & signaling		x
CELSR1	cadherin EGF LAG seven-pass G-type receptor 1	Cell adhesion molecules involved in contact-mediated communication.	Regulation & signaling				x
SLC19A2	solute carrier family 19 member 2	Involved in trasporting thiamine.	Transportation					x
SCYL3	SCY1 like pseudokinase 3	Involved in cell adhesion and migration.	Regulation & signaling					x
NME7	NME/NM23 family member 7	Protein with a kinase domain and transfers phosphate from nucleosides.	Regulation & signaling					x
KIFAP3	kinesin associated protein 3	Involved in the regulation of G protein coupled receptors, including monomeric GTPase ras.	Regulation & signaling					x
PRDX6	peroxiredoxin 6	Involved in the regulation of redox homeostasis and phospolipid turnover.	Regulation & signaling						x
RP11-378J18.8	novel transcript, antisense to MIA3	N/A	N/A							x	x
MIA3	MIA SH3 domain ER export factor 3	Participates in protein export from th endoplasmic reticulum to other organelles.	Transportation							x	x
AIDA	axin interactor	Related to phosphatidylinositol binding activity and Jun kinase cascade.	Regulation & signaling							x	x
FAM177B	family with sequence similarity 177 member B	N/A	N/A							x	x
TAF1A	TATA-box binding protein associated factor, RNA polymerase I subunit A	Protein involved in the pre-initiation complex of transcription.	Regulation & signaling							x	x
BROX	BRO1 domain and CAAX motif containing	Involved in targeting to the vacuole or lysosome.	Regulation & signaling							x	x

## Sheet: Table S2
Table S.2. eQTL’s from SNPs on chromosome 2 associated to cardiovascular conditions.
eQTL gene	Encoding protein	Function	Trait	rs6728861	rs115654617	rs72934535
NBEAL1	neurobeachin like 1	Predicted to be involved in regulatory actvity.	Regulation & signaling	x	x	x
CARF	calcium responsive transcription factor	Involved in the regulation of transcription for BDNF gene.	Regulation & signaling	x	x	x
ICA1L	islet cell autoantigen 1 like	Autoantigen of insulin-dependent diabetes mellitus. Predicted to be involved in transportation.	Transportation, regulation & signaling	x	x	x
FAM117B	family with sequence similarity 177 member B	N/A	N/A	x	x	x
BMPR2	bone morphogenetic protein receptor type 2	Involved in TGF ligand binding and activation of SMAD transcrtiptional activators.	Regulation & signaling	x
WDR12	WD repeat domain 12	Nucleolar protein required to regulate maturation of the large ribosomal subunit.	Regulation & signaling	x	x

## Sheet: Table S3
Table S.3. eQTL’s from SNPs on chromosome 6 associated to cardiovascular conditions.
eQTL gene	Encoding protein	Function	Trait	rs9349379	rs2327429	rs118039278	rs10455872	rs140570886	rs7770628	rs186696265
PHACTR1	phosphatase and actin regulator 1	Involved in coordinating actin dynamic in cell motility and morphology.	Regulation & signaling	x
TBC1D7	TBC1 domain family member 7	Subunit part of the TSC1-TSC2 complex involved in GTPase activation for metabolism regulation.	Regulation & signaling	x
RP1-257A7.4	uncharacterized LOC100130357	N/A	N/A	x
GFOD1	glucose-fructose oxidoreductase domain containing 1	Predicted to participate in oxidoreductase activity.	Regulation & signaling	x
TCF21	transcription factor 21	Regulates genes involved in mesenchyme-derived tissues of the lung, epithelial cells from the kidney, and epicardial cells.	Regulation & signaling		x
TARID	TCF21 antisense RNA inducing promoter demethylation	Long non-coding RNA that regulates gene expression by chromating remodeling.	Regulation		x
RP1-283K11.2	novel transcript	N/A	N/A		x
RP1-283K11.3	novel transcript, antisense to EYA4	N/A	N/A		x
HSPE1P21	heat shock protein family E (Hsp10) member 1 pseudogene 21	Serves as protein chaperone for the correct folding.	Protein Stability		x
SLC22A3	solute carrier family 22 member 3	Involved in transporting organic cations.	Transportation			x	x		x
LPA	lipoprotein(a)	Involved in the inhibition of tissue-type plasminogen activator I. This protein could enhance the formation of an atherosclerotic plaque.	Regulation			x	x	x
SLC22A1	solute carrier family 22 member 1	Involved in transporting organic cations.	Transportation					x		x

## Sheet: Table S4
Table S.4. eQTL’s from SNPs on chromosome 7 associated to cardiovascular conditions.
eQTL gene	Encoding protein	Function	Trait	rs2107595	rs4722172	rs147642358	rs62471956	rs140104968
TWIST1	twist family bHLH transcription factor 1	Involved in the regulation of embryonic development.	Regulation & signaling	x
AC003986.6	novel transcript	N/A	N/A	x
AC073072.5	uncharacterized LOC541472	N/A	N/A		x
STEAP1B	STEAP family member 1B	Predicted to be active in endosome and plasma membrane.	Regulation & signaling		x
AC005682.6	solute carrier family 40 (iron-regulated transporter), member 1 (SLC40A1) pseudogene	Pseudogene involved in iron transportation.	Transportation		x
TOMM7	translocase of outer mitochondrial membrane 7	Subunit involved in the stability of the translocase complex that transports molecules accros the membrane.	Transportation		x
TRIM4	tripartite motif containing 4	Ubiquitin ligase involved in the regulation of protein degradation.	Regulation			x	x	x
GJC3	connexin	Involved in cell-cell communication.	Regulation & signaling				x	x
PCOLCE	procollagen C-endopeptidase enhancer	Involved in the regulation of the structure protein called fibril.	Regulation & signaling					x

## Sheet: Table S5
Table S.5. eQTL’s from SNPs on chromosome 10 associated to cardiovascular conditions and resistance to clopidogrel in Hispanic Caribbeans.
eQTL gene	Encoding protein	Function	Trait	rs7916697	rs4746743	rs4745950	rs1900005	rs1900003	rs1900002	rs7903146
PBLD	phenazine biosynthesis like protein domain containing	Invoved in the regulation of SMAD and TGF-ß signaling cascades.	Regulation & signaling	x	x	x	x	x	x
RP11-153K11.3	novel transcript	N/A	N/A	x	x	x	x	x	x
ATOH7	atonal bHLH transcription factor 7	Involved in the regulation of retinal ganglion cell and optic nerve.	Regulation & signaling	x	x	x	x	x	x
RUFY2	RUN and FYVE domain containing 2	Acts as an adaptor protein regulating signaling cascades in endosomes.	Regulation & signaling	x		x		x	x
DNA2	DNA replication helicase/nuclease 2	Maintains stability of mitochondrial and nuclear DNA.	DNA stability	x	x	x		x	x
SLC25A16	solute carrier family 25 member 16	Involved in transportation of molecules between the citosol and mitochondria.	Transportation			x		x	x
KIF1BP	kinesin family binding protein	Involved in cytoeskeletal protein binding.	Structure					x	x
TCF7L2	transcription factor 7 like 2	Involved in the regulation of embryonic development.	Regulation & signaling							x

## Sheet: Table S6
Table S.6. eQTL’s from SNPs on chromosome 11 associated to cardiovascular conditions.
eQTL gene	Encoding protein	Function	Trait	rs974819
RP11-563P16.1	Novel transcript	lncRNA	N/A	x

## Sheet: Table S7
Table S.7. eQTL’s from SNPs on chromosome 12 associated to cardiovascular conditions
eQTL gene	Encoding protein	Function	Trait	rs3184504	rs7137828	rs11066301	rs11057830
ALDH2	aldehyde dehydrogenase 2 family member	Enzyme involved in the metabolism of alcohol.	Regulation	x	x	x
LINC01405	ncRNA	N/A	N/A	x	x
TMEM116	transmembrane protein 116	Predicted to be an integral component of the membrane.	Structure	x	x	x
ADAM1B	ADAM metallopeptidase domain 1B	Pseudogene	N/A	x	x	x
MAPKAPK5	MAPK activated protein kinase 5	Tumor suppresor kinase Siginvolved in mTOR signaling and regulates HSP27.	Regulation & signaling	x	x	x
NAA25	N-alpha-acetyltransferase 25, NatB auxiliary subunit	Part of the NatB complex involved in acetylation of methionine.	Regulation			x
BRAP	BRCA1 associated protein	Involved in recognizing BRCA1 translocation signal to the nucleus and maintaing the protein in the cytoplasm.	Regulation & signaling			x
SCARB1	scavenger receptor class B member 1	Receptor for HDL.	Regulation & signaling				x
nc = non coding RNA

## Sheet: Table S8
Table S.8. eQTL’s from SNPs on chromosome 15 associated to cardiovascular conditions.
eQTL gene	Encoding protein	Function	Trait	rs11638352	rs10851907	rs7173743
ADAL	adenosine deaminase like	Involved in the remotion of the amine group to produce IMP and methylamine	Metabolism	x
TP53BP1	tumor protein p53 binding protein 1	Involved in DNA repair process.	DNA stability	x
STRCP1	stereocilin pseudogene 1	Pseudogene predicted to be involved in cell adhesion.	Regulation	x
LCMT2	leucine carboxyl methyltransferase 2	Enzyme involved in the tRNA translation process.	Regulation	x
CKMT1A	creatine kinase, mitochondrial 1A	Involved in transfering phosphate from the mitochondria to creatinine in the cytosol.	Regulation	x
STRC	stereocilin	Involved in the structure of sensory hearing cells.	Structure	x
MAP1A	microtubule associated protein 1A	Involved in the asssembly of microtubules.	Structure	x
AC011330.5	histidine acid phosphatase domain containing 2A pseudogene	Pseudogene.	N/A	x
AC011330.13	novel transcript, sense intronic to CATSPER2	lncRNA.	N/A	x
CHRNA5	cholinergic receptor nicotinic alpha 5 subunit	Ligand gated ion channel expressed mostly in brain and muscle tissue.	Regulation & signaling		x
RP11-160C18.2	Golgin A Family	Pseudogene.	N/A		x	x
PSMA4	proteasome 20S subunit alpha 4	Involved in a proteosome complex regulating protein degradation.	Regulation		x	x
CHRNA3	cholinergic receptor nicotinic alpha 3 subunit	Ligand gated ion channel involved in neurotransmission.	Regulation & signaling		x
ADAMTS7	ADAM metallopeptidase with thrombospondin type 1 motif 7	Involved in the regulation of proteins in the extracellular matrix.	Regulation & signaling		x
RP11-650L12.2	novel transcript, antisense to CHRNA5	lncRNA.	N/A		x
IREB2	iron responsive element binding protein 2	Involved in regulationg iron levels.	Regulation		x
ADAMTS7	ADAM metallopeptidase with thrombospondin type 1 motif 7	Involved in the regulation of proteins in the extracellular matrix.	Regulation & signaling			x
MORF4L1	mortality factor 4 like 1	Part of the NuA4 histone acetyltransferase complex and Sin3 complex involved in DNA repair process and histone modification.	DNA stability			x
CTSH	cathepsin H	Protease involved in lysosomal degradation.	Regulation			x
ADAMTS7P3	ADAMTS7 pseudogene 3	Pseudogene.	N/A			x
RPL21P116	ribosomal protein L21 pseudogene 116	Pseudogene.	N/A			x

## Sheet: Table S9
Table S.9. eQTL’s from SNPs on chromosome 19 associated to cardiovascular conditions.
eQTL gene	Encoding protein	Function	Trait	rs55791371	rs6511720	rs7412
SMARCA4	Transcription activator BRG1	Part of the SWI/SNF chromatin remodeling complex involved in regulating gene expression.	Regulation	x
SLC44A2	solute carrier family 44 member 2	Involved in choline transportation.	Transportation	x	x
RGL3	Ral guanine nucleotide dissociation stimulator-like 3	Involved in guanine nucleotide exchange activity.	Regulation & signaling	x
SMARCA1	Probable global transcription activator SNF2L1	Part of the SWI/SNF chromatin remodeling complex involved in regulating gene expression.	Regulation		x
APOE	Apolipoprotein E	Involved in lipid transportation.	Transportation			x

## Sheet: Table S10
Table S.10. eQTL’s from SNPs on chromosome 20 associated to cardiovascular conditions.
eQTL gene	Encoding protein	Function	Trait	rs35610040
CST3	Cystatin-C	Involved in inhibiting cysteine proteinases.	Regulation	x
CST9	Cystatin-9	May posses proteinase inhibitory effect.	Regulation	x
RP11-218C14.8	novel transcript	N/A	N/A	x

[truncated: 1 more sheets: Table S11]
