# Supplementary figures and images for: Non-Random Enrichment of Single-Nucleotide Polymorphisms Associated with Clopidogrel Resistance within Risk Loci Linked to the Severity of Underlying Cardiovascular Diseases: The Role of Admixture
Source: MDPI journal article supplement (doi:10.3390/genes14091813), 2023-09-17

**Figure S1. Flow diagram of the study design.**

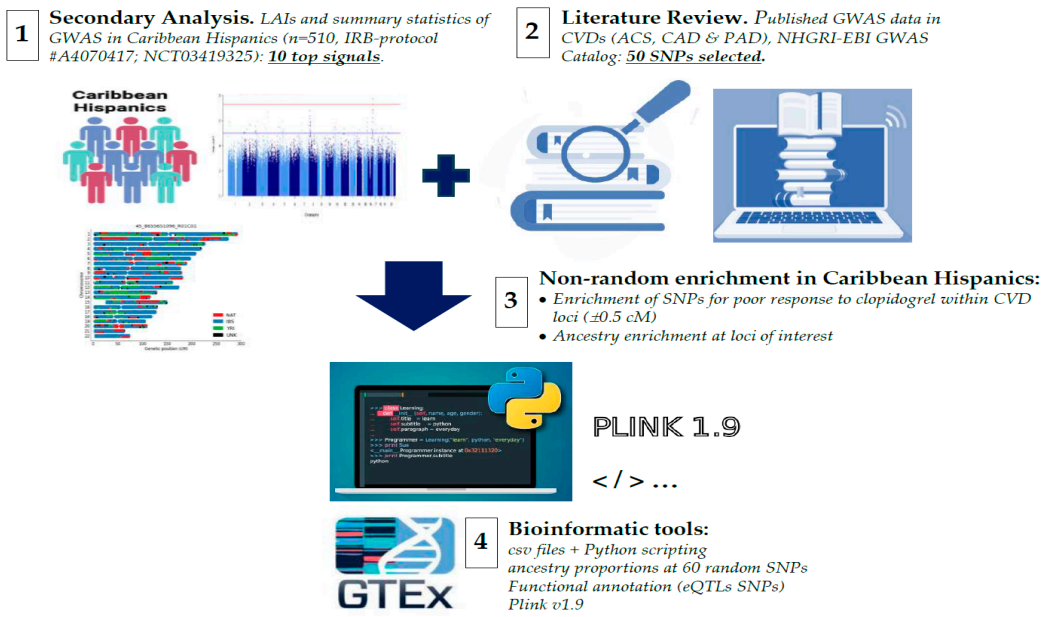

Supplement: s1 [file s1]
